# Supplementary material for: Therapeutic Potential of Linearol in Combination with Radiotherapy for the Treatment of Glioblastoma In Vitro
Source: MDPI journal article supplement (doi:10.3390/ijms24043760), 2023-02-13
Supplement: s1 [file s1]

## SUPPLAMENTARY MATERIAL

### Therapeutic potential of Linearol in combination with radiotherapy for the treatment of glioblastoma *in vitro*

**Table S1.**  $^1\text{H}$  and  $^{13}\text{C}$  NMR of linearol ( $\text{CD}_3\text{OD}$ , 500 MHz)

| No             | $\delta_{\text{C}}$ | Type C        | $\delta_{\text{H}}$ | H | J (Hz)     |
|----------------|---------------------|---------------|---------------------|---|------------|
| 1              | 38.0                | $\text{CH}_2$ | 2.00-1.50           | 2 | o.s        |
| 2              | 26.2                | $\text{CH}_2$ | 2.00-1.50           | 2 | o.s        |
| 3              | 71.3                | CH-OH         | 3.60                | 1 | o.s        |
| 4              | 38.3                | C             | -                   | - | -          |
| 5              | 38.4                | CH            | 2.00-1.50           | 1 | o.s        |
| 6              | 16.9                | $\text{CH}_2$ | 2.00-1.50           | 2 | o. s       |
| 7              | 76.4                | CH-OH         | 3.48                | 1 | br s       |
| 8              | 45.0                | C             | -                   | - | -          |
| 9              | 50.2                | CH            | 2.00-1.50           | 1 | o.s        |
| 10             | 38.5                | C             | -                   | - | -          |
| 11             | 17.1                | $\text{CH}_2$ | 2.00-1.50           | 2 | d (J=7.5)  |
| 12             | 33.2                | $\text{CH}_2$ | 2.00-1.50           | 2 | d (J=1.0)  |
| 13             | 43.8                | CH            | 2.54                | 1 | br s       |
| 14             | 41.0                | $\text{CH}_2$ | 2.00-1.50           | 2 | o.s        |
| 15             | 43.5                | $\text{CH}_2$ | 2.24                | 2 | br s       |
| 16             | 155.2               | C             | -                   | - | -          |
| 17a            | 102.4               | $\text{CH}_2$ | 4.80                | 1 | br s       |
| 17b            |                     |               | 4.75                | 1 | br s       |
| 18a            | 65.3                | $\text{CH}_2$ | 3.97                | 1 | d (J=11.5) |
| 18b            |                     |               | 3.82                | 1 | d (J=11.5) |
| 19             | 11.3                | $\text{CH}_3$ | 0.73                | 3 | s          |
| 20             | 17.5                | $\text{CH}_3$ | 1.09                | 3 | s          |
| C=O            | 172.0               | OC=O          | -                   | - | -          |
| $\text{OCH}_3$ | 19.6                | $\text{CH}_3$ | 2.04                | 3 | s          |

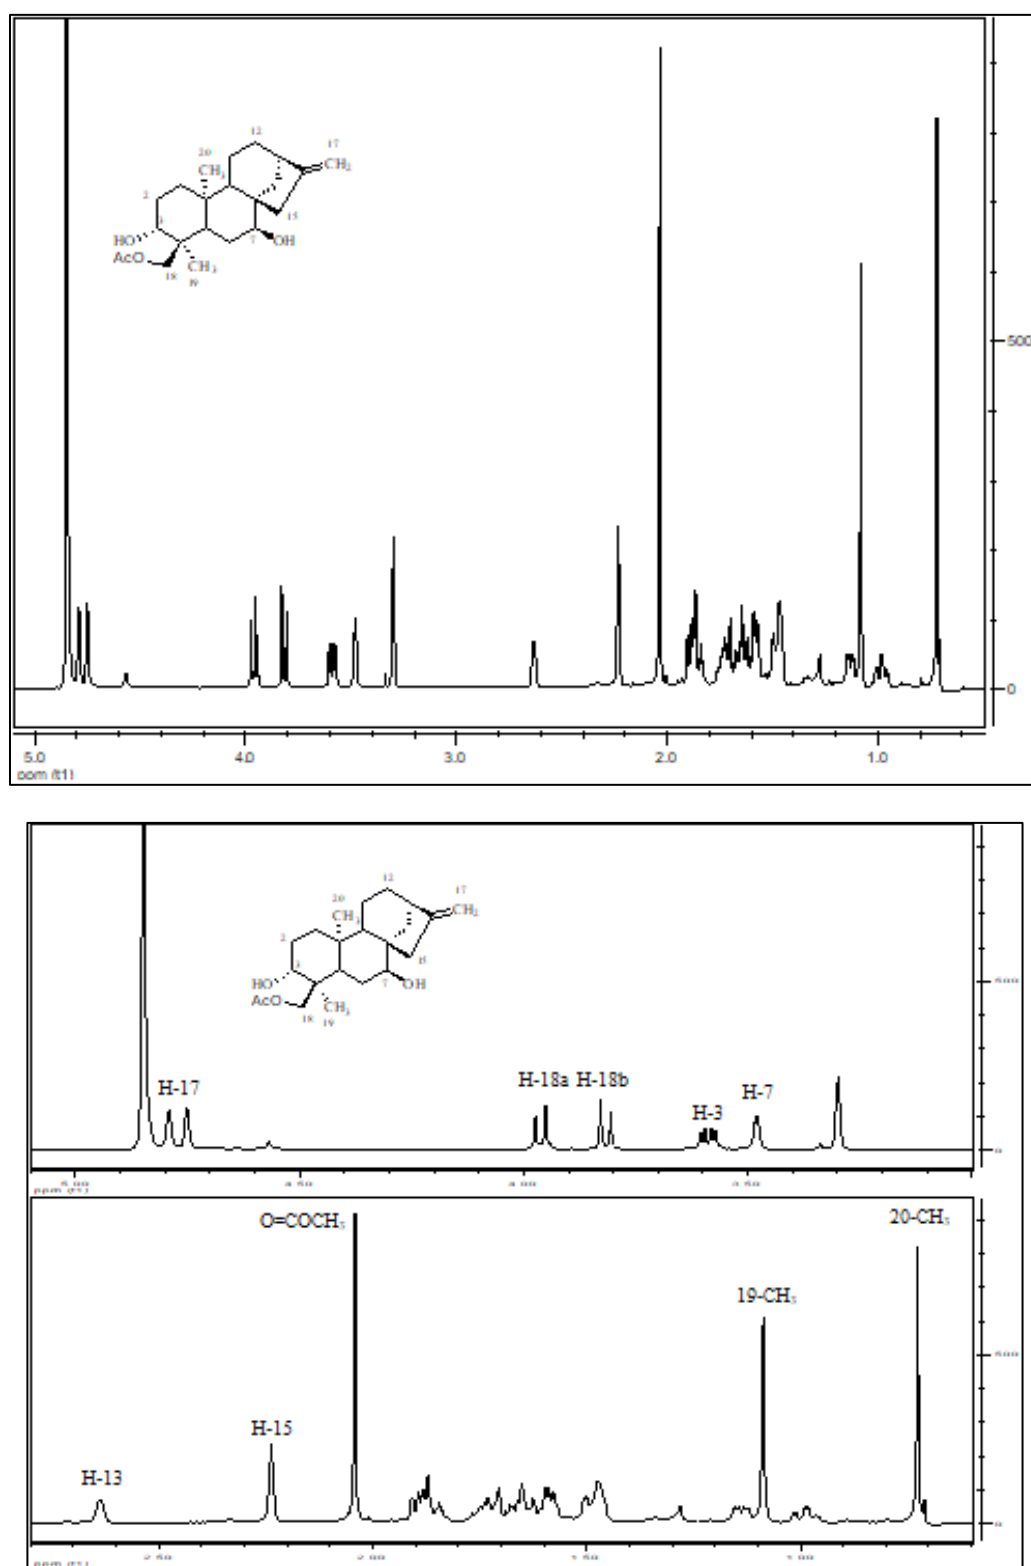

**Figure S1.**  $^1\text{H}$ -NMR spectrum of linearol ( $\text{CD}_3\text{OD}$ , 500 MHz)

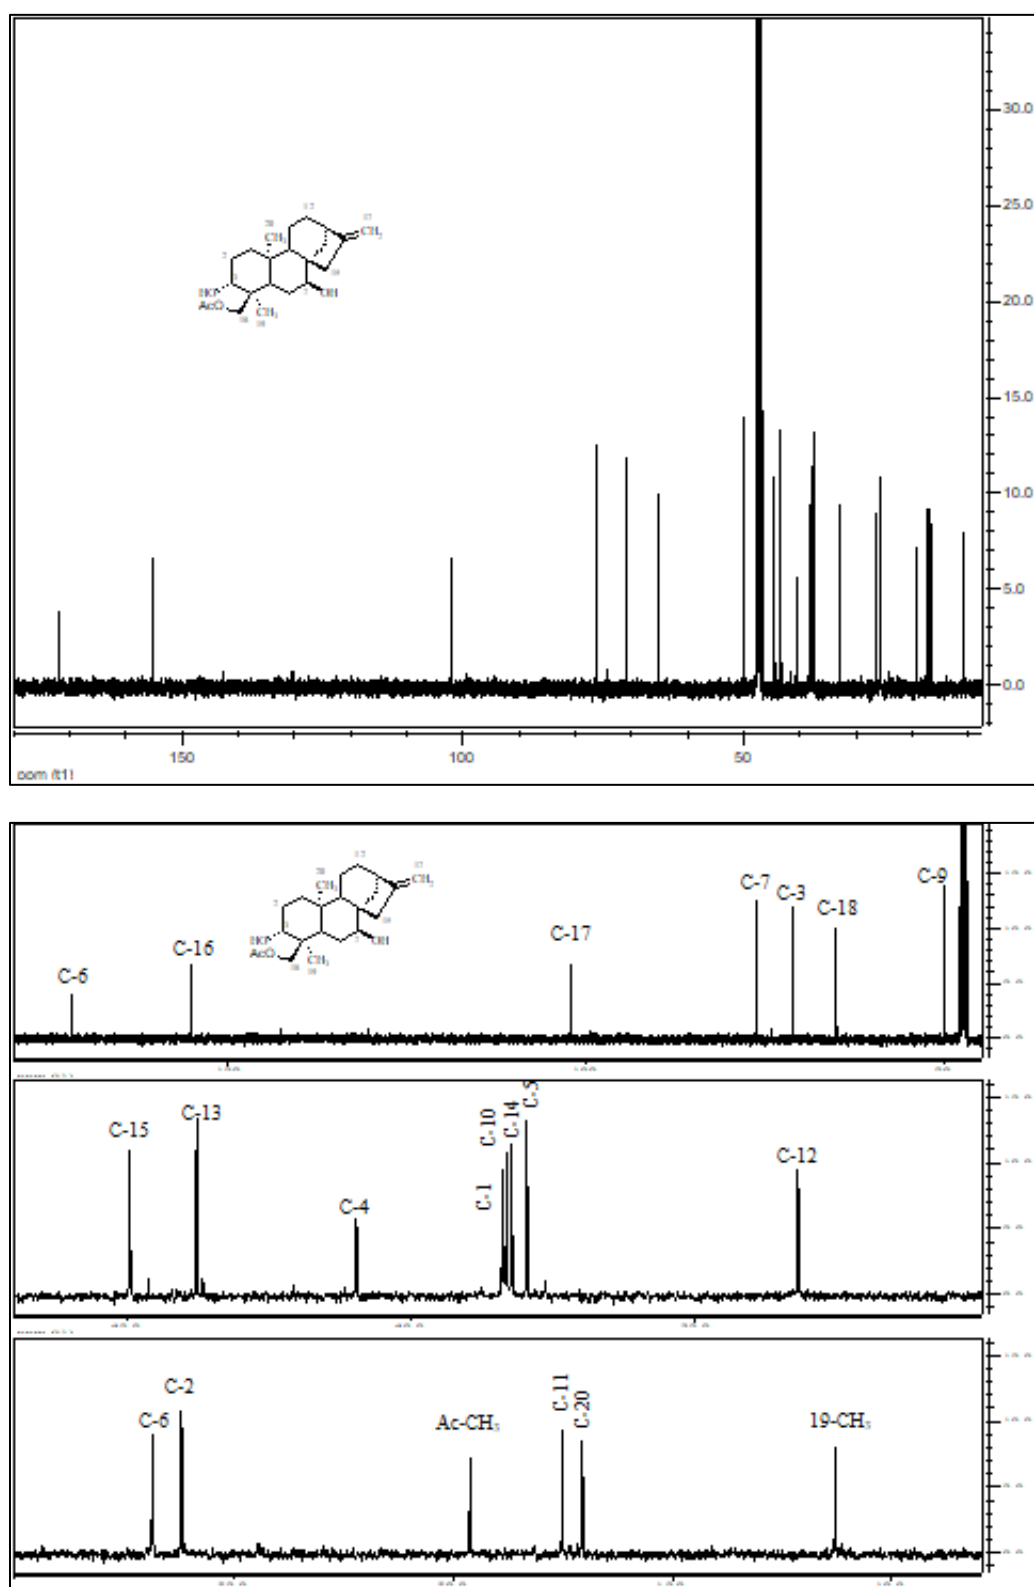

Figure S2.  $^{13}\text{C}$ -NMR spectrum of linearol ( $\text{CD}_3\text{OD}$ , 500 MHz)

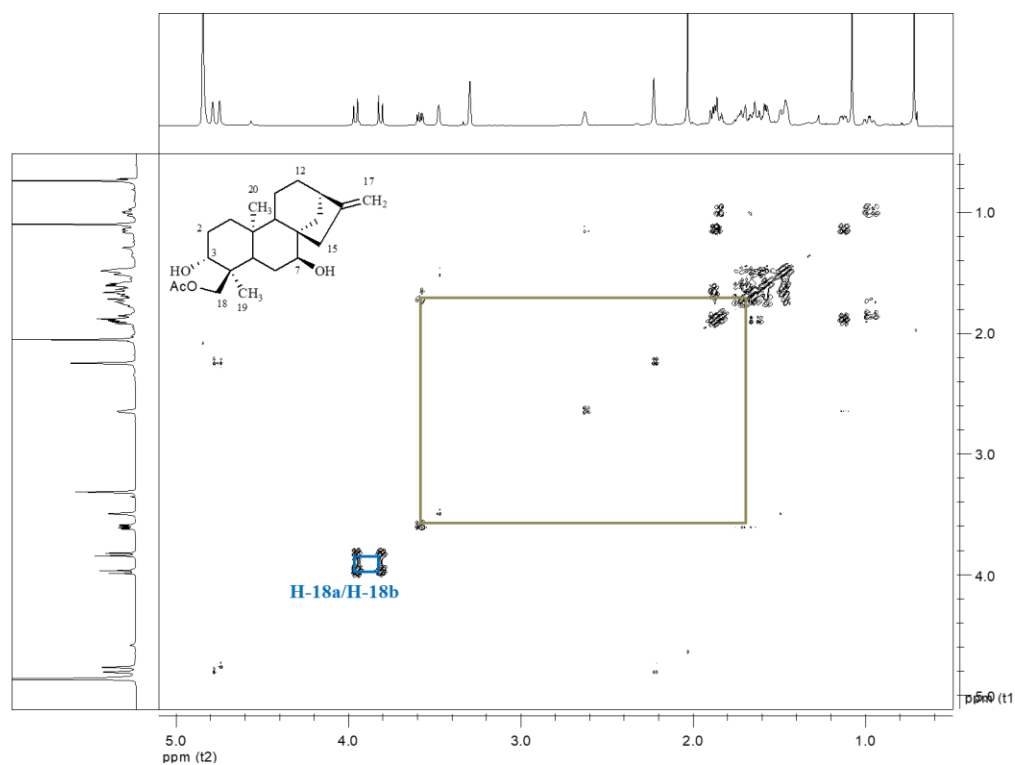

**Figure S3.** gDQCOSY spectrum of linearol (CD<sub>3</sub>OD, 500 MHz)

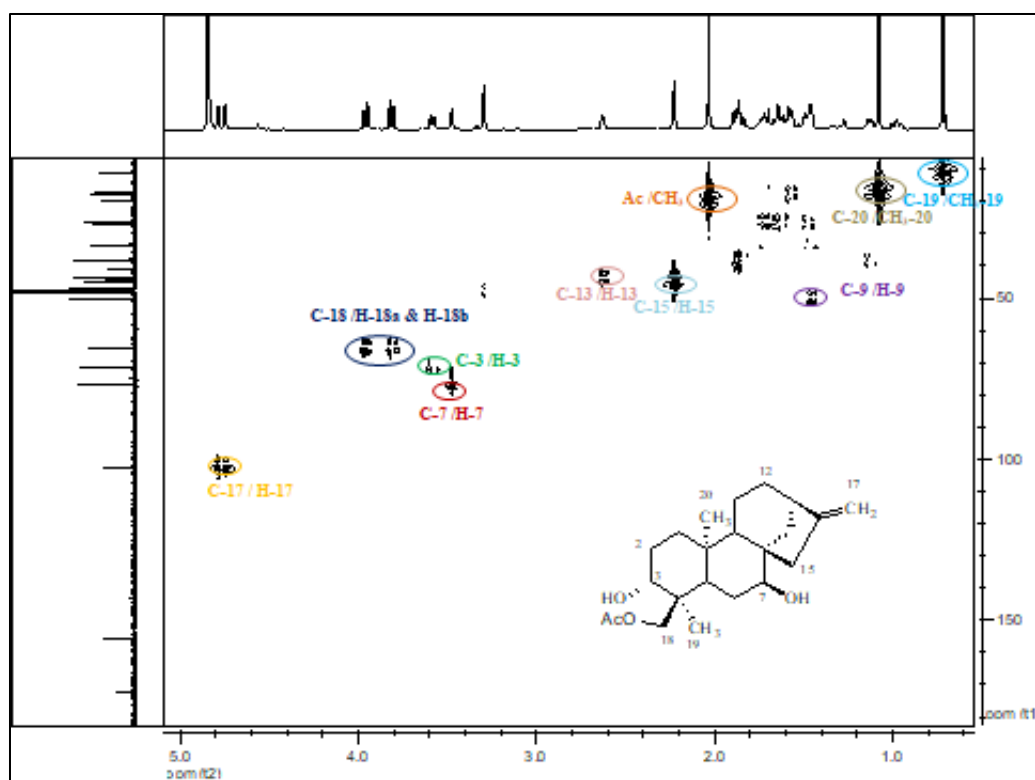

**Figure S4.** gHSQCAD spectrum of linearol (CD<sub>3</sub>OD, 500 MHz)
